# Supplementary material for: Associations between antagonistic SNPs for neuropsychiatric disorders and human brain structure
Source: PubMed Central journal article supplement (PMC11446931; doi:10.1038/s41398-024-03098-1), 2024-10-02
Supplement: 41398_2024_3098_MOESM1_ESM.pdf [file 41398_2024_3098_MOESM1_ESM.pdf]

|    |                                                            |                                  |
|----|------------------------------------------------------------|----------------------------------|
| 1  |                                                            |                                  |
|    |                                                            | <b>Supplementary Information</b> |
| 2  | Supplementary Information .....                            | 1                                |
| 3  | 1. Bootstrapping Test .....                                | 2                                |
| 4  | Methods.....                                               | 2                                |
| 5  | Results.....                                               | 3                                |
| 6  | 2. FOR2107 Study .....                                     | 3                                |
| 7  | Sample Characteristics.....                                | 3                                |
| 8  | Genotyping, Quality Control and Imputation .....           | 4                                |
| 9  | Acquisition and Preprocessing of Structural MRI Data ..... | 5                                |
| 10 | References.....                                            | 6                                |
| 11 | Supplementary Tables.....                                  | 12                               |
| 12 | Table S1 .....                                             | 12                               |
| 13 | Table S2 .....                                             | 13                               |
| 14 | Table S3 .....                                             | 15                               |
| 15 | Table S4 .....                                             | 18                               |
| 16 | Table S5 .....                                             | 19                               |
| 17 | Table S6 .....                                             | 22                               |
| 18 | Supplementary Figures .....                                | 28                               |
| 19 | Figure S1 .....                                            | 28                               |
| 20 | Figure S2.....                                             | 30                               |
| 21 |                                                            |                                  |

22 **1. Bootstrapping Test**

23 *Methods*

24 To test whether the observed number of significant SNP to IDP associations significantly differed  
25 for the eleven antagonistic SNPs, we performed a bootstrapping test. By this, we approximated a  
26 sampling distribution on the number of significant SNP to IDP associations across randomly  
27 sampled sets of eleven SNPs. We run separate comparisons based on resampling from two sets of  
28 SNPs, namely (i) the joined set of SNPs covered in all of the 78 summary statistics of each IDP  
29 (1–3) ( $N=6\ 559\ 812$ ), and (ii) SNPs listed in the summary statistics of the PGC-CDG2 GWAS  
30 meta-analysis (4) (excluding subjects of 23andMe) with  $p \leq 1.0 \times 10^{-06}$  that were covered in all of  
31 the 78 summary statistics ( $N=13\ 999$ ).

32 For each set we randomly sampled  $k$  times eleven SNPs, (i)  $k=10\ 000$  and (ii)  $k=1\ 000$ ,  
33 without replacement and predefined seed. Next, we extracted the  $p$ -values of association for the  
34 eleven randomly drawn SNPs from the 78 summary statistics and corrected for multiple testing  
35 analog to our main analysis. To investigate whether the number of SNP to IDP associations found  
36 for the eleven antagonistic SNPs differs, we estimated the  $p$ -value along the bootstrapped  
37 distribution of the number of significant SNP to IDP associations by  $p = \frac{1 + \#\{t_k^* \geq t\}}{K+1}$ , whereby  $\#\{\}$   
38 counts the occurrence of  $t_k^* \geq t$  with  $t_k^*$  being the number of significant SNP to IDP associations for  
39 the  $k$ -th sampled set of eleven SNPs, and  $t$  being the number of significant SNP to IDP associations  
40 found for the antagonistic SNPs (5). Additionally, we obtained estimation of  $p$ -values for the  
41 number of significant SNP to IDP associations for SA, CT, and subcortical volume measures,

## Linking Antagonistic SNPs to Brain Structure

42 respectively. After correction for multiple testing using the Bonferroni method, significance was  
43 indicated by  $p < 6.25 \times 10^{-03}$  (eight tests).

### 44 **Results**

45 The number of significant SNP to IDP associations for the eleven antagonistic SNPs differed from  
46 the sampled distribution for both of the sets: Resampling from the joined set of SNPs across the  
47 78 summary statistics showed significant differences for the total set of IDPs ( $p = 1.0 \times 10^{-04}$ ), the 35  
48 SA ( $p = 1.0 \times 10^{-04}$ ), the 35 CT ( $p = 5.0 \times 10^{-03}$ ), and the eight subcortical volume measurements  
49 ( $p = 5.0 \times 10^{-04}$ ) (Supplementary Figure S1a-d). Similarly, resampling from the SNPs listed in the  
50 summary statistics of the PGC-CDG2 GWAS meta-analysis (4) with  $p \leq 1.0 \times 10^{-06}$  presented  
51 significant differences for the total set of IDPs ( $p = 3.0 \times 10^{-03}$ ), the 35 SA ( $p = 3.0 \times 10^{-03}$ ), and the  
52 eight subcortical volume measurements ( $p = 1.0 \times 10^{-03}$ ), as well as nominally significant  
53 associations with the 35 CT measurements ( $p = 2.0 \times 10^{-02}$ ) (Supplementary Figure S1e-h).

## 54 **2. FOR2107 Study**

### 55 **Sample Characteristics**

56 The FOR2107 study (6) is an ongoing longitudinal study designed to investigate the neurobiology  
57 of disorders across the affective disorders-psychosis spectrum. At time of analysis, the FOR2107  
58 study comprised  $N = 3\ 214$  participants aged between 18 to 65 years that included healthy controls  
59 (HC) and patients in the affective disorders-psychosis spectrum diagnosed using the Diagnostic  
60 and Statistical Manual of Mental Disorders (DSM)-IV Structured Clinical Interview (7) including  
61 bipolar disorder (BIP), major depressive disorder (MDD), schizoaffective disorder (SZA), and  
62 schizophrenia (SCZ). At two sites, Marburg and Münster (Germany), multimodal data were

## Linking Antagonistic SNPs to Brain Structure

63 collected from each participant covering harmonized magnetic resonance imaging (MRI) scans,  
64 cognitive and psychological assessments, as well as biomaterial for generating genotyping data.

### 65 *Genotyping, Quality Control and Imputation*

66 The genotyping, quality control and imputation of the FOR2107 data set has been described in  
67 detail elsewhere (8). Briefly, the genotyping of the FOR2107 study was performed using the  
68 Infinium PsychArray-24 BeadChip (Illumina, San Diego, CA, US). Genetic quality control was  
69 conducted using PLINK v1.90 (9) and R v3.5.2.

70 For variant filtering, non-autosomal and ambiguous variants were dropped for further  
71 analyses. After alignment of alleles to the 1000 Genomes Phase 1 reference panel (10), variants  
72 not included in the panel were removed. Prior to the imputation variants with a call rate <98%, a  
73 MAF <1%, and/or a Hardy-Weinberg Equilibrium (HWE) test  $p$ -value  $<1.0 \times 10^{-6}$  were excluded.

74 For sample filtering, samples with genotyping rates <98%, sex mismatches or other X-  
75 chromosomal linked conditions, genetic duplicates, cryptic relatedness ( $\hat{\pi} \geq 12.5$ ), and  
76 deviations of the autosomal or X-chromosomal heterozygosity rates (>4 standard deviations (SD)  
77 from the mean), and genetic ancestry components outlier (i.e. samples with >4 SD from the mean  
78 of the first eight multidimensional scaling ancestry components) were also removed. In total,  
79  $n=2\ 241$  participants remained for further analysis.

80 Pre-phasing was performed for each chromosome using SHAPEIT v2 (r837) (11). The  
81 imputation was performed using IMPUTE2 v2.3.2 (12,13) and the 1000 Genomes Phase 3  
82 reference panel (10). Variants with a MAF of <1% and/or an INFO-score of <0.8 were removed.  
83 The genotype dosages of the eleven antagonistic SNPs were extracted from the imputed genetic

## Linking Antagonistic SNPs to Brain Structure

84 data of the FOR2107 study. Furthermore, based on the imputed SNP set multidimensional scaling  
85 (MDS) components were calculated using PLINK v1.9 (9). The first three MDS components were  
86 later included as covariates to adjust for population stratification.

### 87 *Acquisition and Preprocessing of Structural MRI Data*

88 T1-weighted anatomical 3D images were obtained in Marburg on a 3T Siemens Tim-Trio MR  
89 scanner with a 12-channel head matrix Rx-coil and in Münster on a 3T Siemens Prisma MR  
90 scanner with a 20-channel head matrix Rx-coil. For MRI acquisition the MP-RAGE sequence was  
91 used with following parameters: 176 sagittal slices in Marburg, 192 sagittal slices in Münster,  
92 field-of-view=256 mm and a final voxel resolution of  $1 \times 1 \times 1 \text{ mm}^3$ .

93 T1-weighted 3D images were preprocessed using the CAT-12 toolbox (14) version 1184  
94 which builds on the SPM12 toolbox (15). The preprocessing was performed based on default  
95 parameters and included volumetric segmentation into gray matter, white matter, and cerebrospinal  
96 fluid. Using the volume-based diffeomorphic DARTEL algorithm (16) the gray matter volumes  
97 were reparametrized to MNI152 space for spatial normalization. Modulated gray matter volumes  
98 were smoothed using a Gaussian Kernel of 8 mm full width at half maximum. Finally, the total  
99 intracranial volume was extracted.

100  
101  
102  
103  
104  
105  
106  
107  
108  
109  
110  
111  
112  
113  
114  
115  
116  
117  
118  
119  
120

**References**

1. Grasby KL, Jahanshad N, Painter JN, Colodro-Conde L, Bralten J, Hibar DP, et al. The genetic architecture of the human cerebral cortex. *Science*. 2020; **367**.
2. Satizabal CL, Adams HHH, Hibar DP, White CC, Knol MJ, Stein JL, et al. Genetic architecture of subcortical brain structures in 38,851 individuals. *Nat Genet*. 2019; **51**:1624–36.
3. Hibar DP, Adams HHH, Jahanshad N, Chauhan G, Stein JL, Hofer E, et al. Novel genetic loci associated with hippocampal volume. *Nat Commun*. 2017; **8**.
4. Lee PH, Anttila V, Won H, Feng YCA, Rosenthal J, Zhu Z, et al. Genomic Relationships, Novel Loci, and Pleiotropic Mechanisms across Eight Psychiatric Disorders. *Cell*. 2019; **179**:1469-1482.e11.
5. Davison AC, Hinkley DV. Bootstrap methods and their application. Cambridge university press; 1997.
6. Kircher T, Wöhr M, Nenadic I, Schwarting R, Schrott G, Alferink J, et al. Neurobiology of the major psychoses: a translational perspective on brain structure and function—the FOR2107 consortium. *Eur Arch Psychiatry Clin Neurosci*. 2019; **269**:949–62.
7. Wittchen HU, Zaudig M, Fydrich T. SKID. Strukturiertes Klinisches Interview für DSM-IV. Achse I und II. Handanweisung. 1997;
8. Andlauer TFM, Mühleisen TW, Hoffstaedter F, Teumer A, Wittfeld K, Teuber A, et al. Genetic factors influencing a neurobiological substrate for psychiatric disorders. *Transl Psychiatry*. 2021; **11**:24.

## Linking Antagonistic SNPs to Brain Structure

- 121 9. Chang CC, Chow CC, Tellier LCAM, Vattikuti S, Purcell SM, Lee JJ. Second-generation  
122 PLINK: Rising to the challenge of larger and richer datasets. *Gigascience*. 2015; **4**.
- 123 10. Auton A, Abecasis GR, Altshuler DM, Durbin RM, Bentley DR, Chakravarti A, et al. A  
124 global reference for human genetic variation. *Nature*. 2015; **526**:68.
- 125 11. Delaneau O, Zagury JF, Marchini J. Improved whole-chromosome phasing for disease and  
126 population genetic studies. *Nat Methods*. 2013; **10**:5–6.
- 127 12. Howie BN, Donnelly P, Marchini J. A flexible and accurate genotype imputation method  
128 for the next generation of genome-wide association studies. *PLoS Genet*. 2009;  
129 **5**:e1000529.
- 130 13. Howie B, Fuchsberger C, Stephens M, Marchini J, Abecasis GR. Fast and accurate  
131 genotype imputation in genome-wide association studies through pre-phasing. *Nat Genet*.  
132 2012; **44**:955–9.
- 133 14. Gaser C, Dahnke R, Thompson PM, Kurth F, Luders E, Alzheimer’s Disease  
134 Neuroimaging Initiative. CAT – A Computational Anatomy Toolbox for the Analysis of  
135 Structural MRI Data. *bioRxiv*. 2022;1–38.
- 136 15. Penny WD, Friston KJ, Ashburner JT, Kiebel SJ, Nichols TE. Statistical parametric  
137 mapping: the analysis of functional brain images. Elsevier; 2011.
- 138 16. Ashburner J. A fast diffeomorphic image registration algorithm. *Neuroimage*. 2007;  
139 **38**:95–113.
- 140 17. Hoogman M, Bralten J, Hibar DP, Mennes M, Zwiers MP, Schweren LSJ, et al.  
141 Subcortical brain volume differences in participants with attention deficit hyperactivity

## Linking Antagonistic SNPs to Brain Structure

- 142 disorder in children and adults: a cross-sectional mega-analysis. *The Lancet Psychiatry*.  
143 2017; **4**:310–9.
- 144 18. Hoogman M, Muetzel R, Guimaraes JP, Shumskaya E, Mennes M, Zwiers MP, et al.  
145 Brain imaging of the cortex in ADHD: A coordinated analysis of large-scale clinical and  
146 population-based samples. *Am J Psychiatry*. 2019; **176**:531–42.
- 147 19. Van Rooij D, Anagnostou E, Arango C, Auzias G, Behrmann M, Busatto GF, et al.  
148 Cortical and subcortical brain morphometry differences between patients with autism  
149 spectrum disorder and healthy individuals across the lifespan: Results from the ENIGMA  
150 ASD working group. *Am J Psychiatry*. 2018; **175**:359–69.
- 151 20. Hibar DP, Westlye LT, van Erp TGM, Rasmussen J, Leonardo CD, Faskowitz J, et al.  
152 Subcortical volumetric abnormalities in bipolar disorder. *Mol Psychiatry*. 2016; **21**:1710–  
153 6.
- 154 21. Hibar DP, Westlye LT, Doan NT, Jahanshad N, Cheung JW, Ching CRK, et al. Cortical  
155 abnormalities in bipolar disorder: An MRI analysis of 6503 individuals from the  
156 ENIGMA Bipolar Disorder Working Group. *Mol Psychiatry*. 2018; **23**:932–42.
- 157 22. Schmaal L, Veltman DJ, Van Erp TGM, Smann PG, Frodl T, Jahanshad N, et al.  
158 Subcortical brain alterations in major depressive disorder: findings from the ENIGMA  
159 Major Depressive Disorder working group. *Mol Psychiatry*. 2016; **21**:806–12.
- 160 23. Schmaal L, Hibar DP, Sämann PG, Hall GB, Baune BT, Jahanshad N, et al. Cortical  
161 abnormalities in adults and adolescents with major depression based on brain scans from  
162 20 cohorts worldwide in the ENIGMA Major Depressive Disorder Working Group. *Mol*



## Linking Antagonistic SNPs to Brain Structure

- 163            *Psychiatry*. 2016; **22**:900–9.
- 164    24.    Boedhoe PSW, Schmaal L, Abe Y, Alonso P, Ameis SH, Anticevic A, et al. Cortical  
165            abnormalities associated with pediatric and adult obsessive-compulsive disorder: Findings  
166            from the enigma obsessive-compulsive disorder working group. *Am J Psychiatry*. 2018;  
167            **175**:453–62.
- 168    25.    Boedhoe PSW, Schmaal L, Abe Y, Ameis SH, Arnold PD, Batistuzzo MC, et al. Distinct  
169            subcortical volume alterations in pediatric and adult OCD: A worldwide meta- and mega-  
170            analysis. *Am J Psychiatry*. 2017; **174**:60–70.
- 171    26.    Van Erp TGM, Hibar DP, Rasmussen JM, Glahn DC, Pearlson GD, Andreassen OA, et al.  
172            Subcortical brain volume abnormalities in 2028 individuals with schizophrenia and 2540  
173            healthy controls via the ENIGMA consortium. *Mol Psychiatry*. 2015; **21**:547–53.
- 174    27.    Van Erp TGM, Walton E, Hibar DP, Schmaal L, Jiang W, Glahn DC, et al. Cortical Brain  
175            Abnormalities in 4474 Individuals With Schizophrenia and 5098 Control Subjects via the  
176            Enhancing Neuro Imaging Genetics Through Meta Analysis (ENIGMA) Consortium. *Biol*  
177            *Psychiatry*. 2018; **84**:644–54.
- 178    28.    Larivière S, Paquola C, Park B yong, Royer J, Wang Y, Benkarim O, et al. The ENIGMA  
179            Toolbox: multiscale neural contextualization of multisite neuroimaging datasets. *Nat*  
180            *Methods*. 2021; **18**:698–700.
- 181    29.    Ramasamy A, Trabzuni D, Guelfi S, Varghese V, Smith C, Walker R, et al. Genetic  
182            variability in the regulation of gene expression in ten regions of the human brain. *Nat*  
183            *Neurosci*. 2014; **17**:1418–28.

## Linking Antagonistic SNPs to Brain Structure

- 184 30. Hibar DP, Westlye LT, Doan NT, Jahanshad N, Cheung JW, Ching CRK, et al. Cortical  
185 abnormalities in bipolar disorder: An MRI analysis of 6503 individuals from the  
186 ENIGMA Bipolar Disorder Working Group. *Mol Psychiatry*. 2018; **23**:932–42.
- 187 31. Ghossaini M, Mountjoy E, Carmona M, Peat G, Schmidt EM, Hercules A, et al. Open  
188 Targets Genetics: systematic identification of trait-associated genes using large-scale  
189 genetics and functional genomics. *Nucleic Acids Res*. 2021; **49**:D1311–20.
- 190 32. Mountjoy E, Schmidt EM, Carmona M, Schwartzentruber J, Peat G, Miranda A, et al. An  
191 open approach to systematically prioritize causal variants and genes at all published  
192 human GWAS trait-associated loci. *Nat Genet*. 2021; **53**:1527–33.
- 193 33. Buniello A, MacArthur JAL, Cerezo M, Harris LW, Hayhurst J, Malangone C, et al. The  
194 NHGRI-EBI GWAS Catalog of published genome-wide association studies, targeted  
195 arrays and summary statistics 2019. *Nucleic Acids Res*. 2019; **47**:D1005–12.
- 196 34. Eysenck SBG, Eysenck HJ, Barrett P. A revised version of the psychoticism scale. *Pers*  
197 *Individ Dif*. 1985; **6**:21–9.
- 198 35. Smith DJ, Escott-Price V, Davies G, Bailey MES, Colodro-Conde L, Ward J, et al.  
199 Genome-wide analysis of over 106 000 individuals identifies 9 neuroticism-associated  
200 loci. *Mol Psychiatry*. 2016; **21**:749.
- 201 36. Tzourio-Mazoyer N, Landeau B, Papathanassiou D, Crivello F, Etard O, Delcroix N, et al.  
202 Automated Anatomical Labeling of Activations in SPM Using a Macroscopic Anatomical  
203 Parcellation of the MNI MRI Single-Subject Brain. *Neuroimage*. 2002; **15**:273–89.
- 204 37. Rolls ET, Huang CC, Lin CP, Feng J, Joliot M. Automated anatomical labelling atlas 3.

## Linking Antagonistic SNPs to Brain Structure

- 205            *Neuroimage*. 2020; **206**:116189.
- 206    38.    Mordkoff JT. A Simple Method for Removing Bias From a Popular Measure of  
207            Standardized Effect Size: Adjusted Partial Eta Squared. *Adv Methods Pract Psychol Sci*.  
208            2019; **2**:228–32.
- 209    39.    Amunts K, Mohlberg H, Bludau S, Zilles K. Julich-Brain: A 3D probabilistic atlas of the  
210            human brain’s cytoarchitecture. *Science*. 2020; **369**:988–92.
- 211

212 **Supplementary Tables**

213 **Table S1**

214 *Overview of GWAS of Brain Structural Phenotypes by the ENIGMA and CHARGE Consortia*

| Study                       | Brain measures | Brain structural phenotype                                                                                                                                                                                                                                                                                                                                                                                                                                                                                                                                                                                                                                                                                                 | Sample size (discovery cohort) |
|-----------------------------|----------------|----------------------------------------------------------------------------------------------------------------------------------------------------------------------------------------------------------------------------------------------------------------------------------------------------------------------------------------------------------------------------------------------------------------------------------------------------------------------------------------------------------------------------------------------------------------------------------------------------------------------------------------------------------------------------------------------------------------------------|--------------------------------|
| Grasby et al. (2020) (1)    | CT, SA         | Average CT, total SA, 34 CT and 34 SA measurements of the following Desikan-Killiany regions: Frontal pole, medial orbitofrontal, lateral orbitofrontal, rostral anterior cingulate, caudal anterior cingulate, superior frontal, rostral middle frontal, pars orbitalis, pars triangularis, pars opercularis, caudal middle frontal, paracentral, precentral, postcentral, precuneus, superior parietal, inferior parietal, posterior cingulate, isthmus cingulate, insula, supramarginal, entorhinal, parahippocampal, fusiform, temporal pole, inferior temporal, middle temporal, superior temporal, banks of the superior temporal sulcus, transverse temporal, lingual, pericalcarine, cuneus, and lateral occipital | 33 281                         |
| Hibar et al. (2017) (3)     | Volume         | Hippocampal volume                                                                                                                                                                                                                                                                                                                                                                                                                                                                                                                                                                                                                                                                                                         | 26 814                         |
| Satizabal et al. (2019) (2) | Volume         | Seven volume measurements of the accumbens, amygdala, brainstem, caudate nucleus, globus pallidus, putamen, and thalamus                                                                                                                                                                                                                                                                                                                                                                                                                                                                                                                                                                                                   | 37 741                         |

215 Sample size was taken from the requested GWAS summary statistics. CT, cortical thickness; SA,

216 surface area.

Linking Antagonistic SNPs to Brain Structure

217 **Table S2**

218 *Overview of Case-control MRI Studies by the ENIGMA Consortium*

| Study                        | Disorder | Brain measures | Cases/controls | Covariates                                | Multiple testing correction                        |
|------------------------------|----------|----------------|----------------|-------------------------------------------|----------------------------------------------------|
| Hoogman et al. (2017) (17)   | ADHD     | Volume         | 1713/1529      | age, sex, ICV, scanner site               | FDR at $q=0.05$                                    |
| Hoogman et al. (2019) (18)   | ADHD     | CT, SA         | 2246/1934      | age, sex, ICV <sup>1</sup>                | FDR at $q=0.05$                                    |
| van Rooij et al. (2018) (19) | ASD      | CT, SA, Volume | 1658/1606      | age, sex, IQ, ICV <sup>2</sup>            | FDR <sup>3</sup>                                   |
| Hibar et al. (2016) (20)     | BIP      | Volume         | 1710/2594      | age, sex, ICV                             | $p < 4.91 \times 10^{-03}$ for FDR at $q=0.05$     |
| Hibar et al. (2018) (21)     | BIP      | CT, SA         | 1837/2582      | age, sex, ICV <sup>1</sup>                | FDR at $q=0.05$                                    |
| Schmaal et al. (2016) (22)   | MDD      | Volume         | 1728/7199      | age, sex, ICV, scanner site               | Bonferroni correction<br>$p < 5.6 \times 10^{-03}$ |
| Schmaal et al. (2017) (23)   | MDD      | CT, SA         | 2148/7957      | age, sex, scanner site                    | FDR at $q=0.05$                                    |
| Boedhoe et al. (2018) (24)   | OCD      | Volume         | 1830/1759      | age, sex, ICV, scanner site               | Bonferroni correction<br>$p < 5.6 \times 10^{-03}$ |
| Boedhoe et al. (2017) (25)   | OCD      | CT, SA         | 1905/1760      | age, sex, ICV <sup>1</sup> , scanner site | FDR at $q=0.05$                                    |
| van Erp et al. (2016) (26)   | SCZ      | Volume         | 2028/2540      | age, sex, ICV, scanner site               | Bonferroni correction<br>$p < 5.6 \times 10^{-03}$ |
| van Erp et al. (2018) (27)   | SCZ      | CT, SA         | 4474/5098      | age, sex                                  | FDR <sup>3</sup>                                   |

## Linking Antagonistic SNPs to Brain Structure

219 We note that covariates and multiple testing correction were retrieved from the summary statistics overview by the ENIGMA toolbox  
220 (28) (<https://enigma-toolbox.readthedocs.io/en/latest/pages/04.loadsumstats/index.html>) and the manuscripts. <sup>1</sup>only for SA measures.  
221 <sup>2</sup>only for subcortical volume measures. <sup>3</sup> $q$  was not further specified in the manuscript. ADHD, attention deficit hyperactivity disorder;  
222 ASD, autism spectrum disorder; BIP, bipolar disorder; CT, cortical thickness; FDR, false discovery rate; ICV, intracranial volume;  
223 MDD, major depressive disorder; OCD, obsessive-compulsive disorder; SA, surface area; SCZ, schizophrenia.

Linking Antagonistic SNPs to Brain Structure

224 **Table S3**

225 *Antagonistic SNPs and eQTLs within Brain Tissues as Registered in GTEx and BRAINEAC*

| rsID                    | Gene(s)                                                                                                                           | GTEx                                                                                                                                                                                                                                                                                                                                                                                                                                                                                                                           | BRAINEAC                                                                                         |                                                |      |                                                                         |
|-------------------------|-----------------------------------------------------------------------------------------------------------------------------------|--------------------------------------------------------------------------------------------------------------------------------------------------------------------------------------------------------------------------------------------------------------------------------------------------------------------------------------------------------------------------------------------------------------------------------------------------------------------------------------------------------------------------------|--------------------------------------------------------------------------------------------------|------------------------------------------------|------|-------------------------------------------------------------------------|
|                         |                                                                                                                                   |                                                                                                                                                                                                                                                                                                                                                                                                                                                                                                                                | AveALL                                                                                           | FCTX                                           | OCTX | TCTX                                                                    |
| rs2388334               | n.s.                                                                                                                              |                                                                                                                                                                                                                                                                                                                                                                                                                                                                                                                                |                                                                                                  |                                                |      |                                                                         |
| rs301805                | <i>RERE</i><br><i>GPR157</i>                                                                                                      | CAU: $p=3.0 \times 10^{-06}$ ; HIPP: $p=4.0 \times 10^{-06}$ ; NAcc: $p=1.7 \times 10^{-05}$ ; CTX: $p=4.8 \times 10^{-05}$                                                                                                                                                                                                                                                                                                                                                                                                    | $6.3 \times 10^{-08}$                                                                            | $6.7 \times 10^{-05}$<br>$3.1 \times 10^{-04}$ |      |                                                                         |
| rs75595651 <sup>1</sup> | n.s.                                                                                                                              |                                                                                                                                                                                                                                                                                                                                                                                                                                                                                                                                |                                                                                                  |                                                |      |                                                                         |
| rs1933802               | <i>LIN28B-AS1</i><br><i>HACE1</i>                                                                                                 | CAU: $p=2.3 \times 10^{-06}$ ; PUT: $p=4.8 \times 10^{-07}$<br>CTX: $p=6.1 \times 10^{-06}$                                                                                                                                                                                                                                                                                                                                                                                                                                    |                                                                                                  |                                                |      |                                                                         |
| rs6748341               | <i>CUL3</i>                                                                                                                       | CTX: $p=4.9 \times 10^{-06}$                                                                                                                                                                                                                                                                                                                                                                                                                                                                                                   |                                                                                                  |                                                |      |                                                                         |
| rs3806843               | <i>PCDHA</i> <sup>2</sup><br><i>PCDHB</i> <sup>2</sup><br><i>PCDHG</i> <sup>2</sup><br><i>HARS</i><br><i>SRA1</i><br><i>WDR55</i> | CAU: $p=8.1 \times 10^{-10}$ ; NAcc: $p=2.2 \times 10^{-09}$ ; CBh: $p=2.9 \times 10^{-14}$ ; CTX: $p=2.2 \times 10^{-12}$ ; PUT: $p=2.0 \times 10^{-06}$ ; CB: $p=4.0 \times 10^{-15}$ ; FCTX (BA9): $p=3.0 \times 10^{-07}$ ; ACC (BA24): $p=1.5 \times 10^{-06}$ ; HYPO: $p=2.1 \times 10^{-06}$<br>CBh: $p=3.3 \times 10^{-05}$ ; CTX: $p=5.9 \times 10^{-05}$ ; CB: $p=1.9 \times 10^{-06}$<br>HIPP: $p=1.2 \times 10^{-05}$<br>CAU: $p=5.0 \times 10^{-05}$ ; CTX: $p=1.2 \times 10^{-05}$ ; CB: $p=1.8 \times 10^{-07}$ | $5.6 \times 10^{-08}$<br>$2.2 \times 10^{-04}$<br>$3.2 \times 10^{-04}$<br>$4.0 \times 10^{-10}$ |                                                |      | $2.8 \times 10^{-05}$<br>$2.4 \times 10^{-04}$<br>$1.9 \times 10^{-07}$ |

Continues on the next page

## Linking Antagonistic SNPs to Brain Structure

**Table S3 continued**

| rsID      | Gene(s)           | GTE <sub>x</sub>                                                                                                                                                                                                                                                                                                                                                                                    | BRAINEAC              |      |                       |      |
|-----------|-------------------|-----------------------------------------------------------------------------------------------------------------------------------------------------------------------------------------------------------------------------------------------------------------------------------------------------------------------------------------------------------------------------------------------------|-----------------------|------|-----------------------|------|
|           |                   |                                                                                                                                                                                                                                                                                                                                                                                                     | AveALL                | FCTX | OCTX                  | TCTX |
| rs3806843 | <i>ZMAT2</i>      | CAU: $p=3.2 \times 10^{-06}$ ; NAcc: $p=3.6 \times 10^{-05}$ ; CBh: $p=9.1 \times 10^{-06}$ ; CTX: $p=3.4 \times 10^{-06}$ ; PUT: $p=1.3 \times 10^{-05}$ ; CB: $p=1.1 \times 10^{-06}$                                                                                                                                                                                                             |                       |      |                       |      |
| rs9329221 | <i>TMCO6</i>      | CBh: $p=5.0 \times 10^{-10}$ ; CB: $p=4.3 \times 10^{-09}$                                                                                                                                                                                                                                                                                                                                          |                       |      |                       |      |
|           | <i>LINCR-0001</i> | CAU: $p=3.2 \times 10^{-08}$ ; HIPPI: $p=2.1 \times 10^{-05}$                                                                                                                                                                                                                                                                                                                                       |                       |      |                       |      |
| rs2921036 | <i>ERII</i>       |                                                                                                                                                                                                                                                                                                                                                                                                     | $1.6 \times 10^{-09}$ |      | $1.3 \times 10^{-05}$ |      |
|           | <i>FAM85B</i>     | CAU: $p=8.1 \times 10^{-10}$ ; HIPPI: $p=7.5 \times 10^{-12}$ ; NAcc: $p=3.6 \times 10^{-14}$ ; CBh: $p=4.4 \times 10^{-11}$ ; CTX: $p=3.0 \times 10^{-16}$ ; PUT: $p=1.5 \times 10^{-07}$ ; CB: $p=1.4 \times 10^{-15}$ ; FCTX (BA9): $p=1.4 \times 10^{-13}$ ; ACC (BA24): $p=1.8 \times 10^{-08}$ ; HYPO: $p=2.6 \times 10^{-13}$ ; AMY: $p=3.0 \times 10^{-12}$ ; STNG: $p=2.3 \times 10^{-07}$ |                       |      |                       |      |

226 Six of the eight antagonistic SNPs that were significantly associated with at least one brain image-derived phenotype were part of an  
 227 eQTL in a specific brain tissue. Results are reported with  $p < 4.0 \times 10^{-04}$  corresponding to a Bonferroni correction for eight SNPs and 16  
 228 brain tissues. Note that pseudogenes were excluded. <sup>1</sup>rs75595651 was replaced by the proxy SNP rs77087420. <sup>2</sup>marks gene clusters,  
 229 whereby we report the  $p$ -value with the lowest value among the genes of that cluster. ACC, anterior cingulate cortex; AMY, amygdala;  
 230 AveALL, average across all ten brain tissues obtained in the database of BRAINEAC (29); BA9, Brodmann Area 9; BA24, Brodmann  
 231 Area 24; BRAINEAC, Brain eQTL Almanac; CAU, caudate; CB, cerebellum; CBh, cerebellar hemisphere; CTX, cortex; FCTX, frontal



### Linking Antagonistic SNPs to Brain Structure

232 cortex; GTE<sub>x</sub>, Genotype-Tissue Expression database, HIP<sub>P</sub>, hippocampus; HYPO, hypothalamus; NAcc, nucleus accumbens; n.s., not  
233 significant; OCT<sub>X</sub>, occipital cortex; PUT, putamen; STNG, substantia nigra; TCT<sub>X</sub>, temporal cortex.

Linking Antagonistic SNPs to Brain Structure

234 **Table S4**

235 *Significant Brain Structural Alterations in Patients with Neuropsychiatric Disorders*

| Disorder            | Measure         | Brain region           | $d_{\text{left}}$ | $p_{\text{FDR, left}}$ | $d_{\text{right}}$    | $p_{\text{FDR, right}}$ |
|---------------------|-----------------|------------------------|-------------------|------------------------|-----------------------|-------------------------|
| BIP (30)            | CT              | caudal ant. cingulate  | -0.095            | $4.2 \times 10^{-02}$  | n.s.                  | n.s.                    |
|                     |                 | rostral ant. cingulate | -0.153            | $3.8 \times 10^{-05}$  | n.s.                  | n.s.                    |
| MDD (23)            | CT              | post. cingulate        | -0.099            | $1.8 \times 10^{-02}$  | -0.093                | $2.2 \times 10^{-02}$   |
|                     |                 | rostral ant. cingulate | -0.130            | $3.0 \times 10^{-02}$  | -0.098                | $3.4 \times 10^{-02}$   |
| SCZ (26,27)         | CT <sup>1</sup> | post. cingulate        | -0.298            | $4.7 \times 10^{-21}$  | -0.310                | $1.2 \times 10^{-26}$   |
|                     |                 | supramarginal          | -0.395            | $4.9 \times 10^{-15}$  | -0.386                | $1.3 \times 10^{-17}$   |
|                     | SA <sup>2</sup> | caudal ant. cingulate  | -0.128            | $5.1 \times 10^{-04}$  | -0.156                | $1.2 \times 10^{-08}$   |
|                     |                 | post. cingulate        | -0.117            | $1.5 \times 10^{-03}$  | -0.125                | $1.3 \times 10^{-03}$   |
|                     |                 | insula                 | -0.122            | $3.5 \times 10^{-03}$  | -0.113                | $4.3 \times 10^{-03}$   |
|                     |                 | lateral orbitofrontal  | -0.179            | $4.2 \times 10^{-05}$  | -0.150                | $1.1 \times 10^{-04}$   |
|                     |                 | lingual                | -0.148            | $7.8 \times 10^{-05}$  | -0.168                | $8.3 \times 10^{-07}$   |
|                     |                 | pars opercularis       | -0.151            | $9.0 \times 10^{-06}$  | -0.146                | $2.0 \times 10^{-07}$   |
|                     |                 | pericalcarine          | -0.133            | $1.7 \times 10^{-03}$  | -0.107                | $3.8 \times 10^{-03}$   |
|                     |                 | superior temporal      | -0.196            | $9.2 \times 10^{-09}$  | -0.195                | $9.3 \times 10^{-07}$   |
| transverse temporal | -0.151          | $7.4 \times 10^{-03}$  | -0.169            | $9.0 \times 10^{-09}$  |                       |                         |
| Disorder            | Measure         | Brain region           | $d$               |                        | $p$                   |                         |
| SCZ                 | Vol.            | nucleus accumbens      | -0.25             |                        | $1.5 \times 10^{-05}$ |                         |

236 Table S4 shows case-control differences denoted by Cohen's  $d$  that were observed as significant  
237 after multiple testing correction (cortical IDPs:  $p_{\text{FDR}} < 0.05$ ; subcortical IDPs in SCZ:  $p < 5.6 \times 10^{-03}$ )  
238 in the respective MRI study by the ENIGMA Consortium. Case-control differences were  
239 significant for patients of BIP, MDD, and SCZ only. Note that our analysis only comprised IDPs  
240 that were significantly associated with an antagonistic SNP. For cortical IDPs in BIP and MDD as  
241 well as subcortical IDPs in SCZ statistics were taken from Table 1 in (23,26,30). <sup>1</sup>Statistics were  
242 taken from the Supplementary Table 4a, and <sup>2</sup>Table 5a in (27). BIP, bipolar disorder; CT, cortical  
243 thickness; FDR, false discovery rate; MDD, major depressive disorder; n.s., not significant; SA,  
244 surface area; SCZ, schizophrenia.

Linking Antagonistic SNPs to Brain Structure

245 **Table S5**

246 *Trait Associations of the Antagonistic SNPs Listed in Open Targets Genetics*

| rsID      | Category   | EA | Associated traits [ <i>p</i> -value; $\beta$ ; Study accession number]                                                                                                                                                                                                                                                                                                                                                                                                                                                                                                                                                                                                                                                                                                                                                                                                                      |
|-----------|------------|----|---------------------------------------------------------------------------------------------------------------------------------------------------------------------------------------------------------------------------------------------------------------------------------------------------------------------------------------------------------------------------------------------------------------------------------------------------------------------------------------------------------------------------------------------------------------------------------------------------------------------------------------------------------------------------------------------------------------------------------------------------------------------------------------------------------------------------------------------------------------------------------------------|
| rs2388334 | Behavior   | G  | Time spend outdoors in summer [ $p=6.9\times 10^{-19}$ ; $\beta=-0.02$ ; NEALE2_1050]; Average total household income before tax [ $p=1.8\times 10^{-18}$ ; $\beta=0.02$ ; NEALE2_738]; Job involves mainly walking or standing [ $p=3.0\times 10^{-17}$ ; $\beta=-0.03$ ; NEALE2_806]; Job involves heavy manual or physical work [ $p=4.0\times 10^{-16}$ ; $\beta=-0.02$ ; NEALE2_816]; Time spent using computer [ $p=3.5\times 10^{-13}$ ; $\beta=0.02$ ; NEALE2_1080]; Participation in an health questionnaire (not invited vs invited) [ $p=3.3\times 10^{-11}$ ; $\beta=-0.006$ ; GCST90012794]; Time spent watching television (tv) [ $p=1.3\times 10^{-10}$ ; $\beta=-0.01$ ; NEALE2_1070]; Time spent outdoors in winter [ $p=1.6\times 10^{-10}$ ; $\beta=-0.01$ ; NEALE2_1060]; Number of days/week walked 10+ minutes [ $p=2.5\times 10^{-09}$ ; $\beta=-0.03$ ; NEALE2_864] |
|           | Cognition  |    | Intelligence [ $p=3.6\times 10^{-29}$ ; $\beta=0.03$ ; GCST006250]; Cognitive performance [ $p=1.7\times 10^{-26}$ ; $\beta=0.03$ ; GCST006572]; Fluid intelligence score [ $p=4.8\times 10^{-11}$ ; $\beta=0.06$ ; NEALE2_20016_raw]                                                                                                                                                                                                                                                                                                                                                                                                                                                                                                                                                                                                                                                       |
|           | Education  |    | College or university degree   qualifications [ $p=2.8\times 10^{-37}$ ; $\beta=0.06$ ; NEALE2_6138_1]; A levels/as levels or equivalent   qualifications [ $p=7.0\times 10^{-14}$ ; $\beta=0.04$ ; NEALE2_6138_2]; Cses or equivalent   qualifications [ $p=9.2\times 10^{-10}$ ; $\beta=-0.04$ ; NEALE2_6138_4]; Educational attainment [ $p=3.2\times 10^{-09}$ ; $\beta=0.03$ ; GCST003496]; Age completed full time education [ $p=5.4\times 10^{-09}$ ; $\beta=0.01$ ; NEALE2_845]; Year ended full time education [ $p=2.4\times 10^{-08}$ ; $\beta=0.09$ ; NEALE2_22501_raw]                                                                                                                                                                                                                                                                                                        |
|           | Food pref. |    | Muesli   cereal type [ $p=3.1\times 10^{-13}$ ; $\beta=0.05$ ; NEALE2_1468_4]; Wholemeal or wholegrain   bread type [ $p=2.1\times 10^{-10}$ ; $\beta=0.03$ ; NEALE2_1448_3]; Hot drink temperature [ $p=7.9\times 10^{-10}$ ; $\beta=-0.008$ ; NEALE2_1518]; Cereal intake [ $p=2.3\times 10^{-09}$ ; $\beta=0.01$ ; NEALE2_1458]; White   bread type [ $p=4.4\times 10^{-09}$ ; $\beta=-0.03$ ; NEALE2_1448_1]                                                                                                                                                                                                                                                                                                                                                                                                                                                                            |

Continues on the next page

## Linking Antagonistic SNPs to Brain Structure

**Table S5 continued**

| rsID       | Category    | EA | Associated traits [ $p$ -value; $\beta$ ; Study accession number]                                                                                                                                                                                                                                                                                                                                                                                                                                                                                  |
|------------|-------------|----|----------------------------------------------------------------------------------------------------------------------------------------------------------------------------------------------------------------------------------------------------------------------------------------------------------------------------------------------------------------------------------------------------------------------------------------------------------------------------------------------------------------------------------------------------|
| rs301805   | Neuroticism | G  | Feeling tense [ $p=7.6\times 10^{-09}$ ; $\beta=-0.01$ ; GCST006952]; Feeling miserable [ $p=2.7\times 10^{-08}$ ; $\beta=-0.01$ ; GCST006943]; Tense / 'highly strung' [ $p=3.9\times 10^{-08}$ ; $\beta=-0.04$ ; NEALE2_1990]; Depressed affect [ $p=4.2\times 10^{-08}$ ; $\beta=-0.01$ ; GCST006475]                                                                                                                                                                                                                                           |
|            | Chronotype  |    | Daytime nap [ $p=6.9\times 10^{-09}$ ; $\beta=0.007$ ; GCST011494]                                                                                                                                                                                                                                                                                                                                                                                                                                                                                 |
| rs75595651 | Neuroticism | T  | Fed-up feelings [ $p=6.2\times 10^{-10}$ ; $\beta=-0.06$ ; NEALE2_1960; $p=3.0\times 10^{-08}$ ; $\beta=-0.03$ ; GCST006947]; Miserableness [ $p=1.1\times 10^{-09}$ ; $\beta=-0.06$ ; NEALE2_1930; $p=1.5\times 10^{-08}$ ; $\beta=-0.03$ ; GCST006943]                                                                                                                                                                                                                                                                                           |
| rs1933802  | Neuroticism | G  | Feeling guilty [ $p=7.3\times 10^{-09}$ ; $\beta=0.01$ ; GCST006945]                                                                                                                                                                                                                                                                                                                                                                                                                                                                               |
| rs6748341  | Behavior    | G  | Age at first sexual intercourse [ $p=1.1\times 10^{-11}$ ; $\beta=0.01$ ]; Walk   types of transport used (excluding work) [ $p=4.3\times 10^{-08}$ ; $\beta=0.03$ ; NEALE2_6162_2]                                                                                                                                                                                                                                                                                                                                                                |
| rs3806843  | Cognition   | C  | Intelligence [ $p=1.4\times 10^{-08}$ ; $\beta=0.02$ ; GCST006250]                                                                                                                                                                                                                                                                                                                                                                                                                                                                                 |
| rs9329221  | Behavior    | T  | Age first had sexual intercourse [ $p=1.0\times 10^{-14}$ ; $\beta=-0.07$ ; NEALE2_2139_raw; $p=4.2\times 10^{-13}$ ; $\beta=-0.02$ ; GCST90000047]                                                                                                                                                                                                                                                                                                                                                                                                |
|            | Neuroticism |    | Neuroticism [ $p=8.0\times 10^{-21}$ ; $\beta=-0.05$ ; GCST005232; $p=1.7\times 10^{-18}$ ; $\beta=-0.07$ ; NEALE2_20127_raw; $p=1.6\times 10^{-15}$ ; $\beta=-0.02$ ; GCST005327; $p=6.6\times 10^{-15}$ ; $\beta=-0.03$ ; GCST003770]; Worrier / anxious feelings [ $p=3.4\times 10^{-18}$ ; $\beta=-0.04$ ; NEALE2_1980]; Irritability [ $p=2.3\times 10^{-14}$ ; $\beta=-0.04$ ; NEALE2_1940]; Miserableness [ $p=2.2\times 10^{-13}$ ; $\beta=-0.03$ ; NEALE2_1930]; Nervous feelings [ $p=1.2\times 10^{-12}$ ; $\beta=-0.04$ ; NEALE2_1970] |
|            | Chronotype  |    | Sleep duration [ $p=2.3\times 10^{-08}$ ; $\beta=0.01$ ; NEALE2_1160]                                                                                                                                                                                                                                                                                                                                                                                                                                                                              |
|            | Food pref.  |    | Cheese intake [ $p=5.1\times 10^{-13}$ ; $\beta=-0.02$ ; NEALE2_1408]                                                                                                                                                                                                                                                                                                                                                                                                                                                                              |
| rs2921036  | Behavior    | C  | Age first had sexual intercourse [ $p=6.4\times 10^{-13}$ ; $\beta=-0.07$ ; NEALE2_2139_raw; $p=7.1\times 10^{-12}$ ; $\beta=-0.01$ ; GCST90000047]                                                                                                                                                                                                                                                                                                                                                                                                |

Continues on the next page

## Linking Antagonistic SNPs to Brain Structure

**Table S5 continued**

| rsID      | Category    | EA | Associated traits [ <i>p</i> -value; $\beta$ ; Study accession number]                                                                                                                                                                                                                                                                                                                                                                                                                                                                                                                                                                                                                                                                                                                                                                                                                              |
|-----------|-------------|----|-----------------------------------------------------------------------------------------------------------------------------------------------------------------------------------------------------------------------------------------------------------------------------------------------------------------------------------------------------------------------------------------------------------------------------------------------------------------------------------------------------------------------------------------------------------------------------------------------------------------------------------------------------------------------------------------------------------------------------------------------------------------------------------------------------------------------------------------------------------------------------------------------------|
| rs2921036 | Neuroticism | C  | Neuroticism score [ $p=6.2\times 10^{-26}$ ; $\beta=-0.09$ ; NEALE2_20127_raw; $p=8.0\times 10^{-26}$ ; $\beta=-0.06$ ; GCST005232; $p=8.3\times 10^{-16}$ ; $\beta=-0.02$ ; GCST005327; $p=1.2\times 10^{-14}$ ; $\beta=-0.03$ ; GCST003770]; Worrier / anxious feelings [ $p=9.5\times 10^{-23}$ ; $\beta=-0.05$ ; NEALE2_1980]; Irritability [ $p=3.0\times 10^{-15}$ ; $\beta=-0.04$ ; NEALE2_1940]; Nervous feelings [ $p=4.2\times 10^{-15}$ ; $\beta=-0.04$ ; NEALE2_1970]; Miserableness [ $p=2.0\times 10^{-13}$ ; $\beta=-0.03$ ; NEALE2_1930]; Worry too long after embarrassment [ $p=1.2\times 10^{-12}$ ; $\beta=-0.03$ ; NEALE2_2000]; Fed-up feelings [ $p=2.2\times 10^{-12}$ ; $\beta=-0.03$ ; NEALE2_1960]; Tense / 'highly strung' [ $p=3.3\times 10^{-12}$ ; $\beta=-0.04$ ; NEALE2_1990]; Sensitivity / hurt feelings [ $p=1.9\times 10^{-10}$ ; $\beta=-0.03$ ; NEALE2_1950] |

247 Associated traits with  $p < 5 \times 10^{-08}$  were reported with the respective study accession number from Open Targets Genetics (31,32). Here  
 248 numbers starting with 'GCST' refer to studies retrieved from the NHGRI-EBI GWAS Catalog (33) and those with 'NEALE2' refer to  
 249 GWAS analyses using the UKBB data (<http://www.nealelab.is/uk-biobank>).  $\beta$  denotes the effect size in relation to the effect allele.  
 250 Note that we assigned traits to the category 'Neuroticism' based on the items of the neuroticism scale of Eysenck Personality  
 251 Questionnaire-Revised Short Form (34) that were part of the mental health factors assessed in the UKBB (35). EA, effect allele; GWAS,  
 252 genome-wide association study; pref., preferences; SNP, single-nucleotide polymorphism.

Linking Antagonistic SNPs to Brain Structure

253 **Table S6**

254 *Whole Brain Analysis for the Eleven Antagonistic SNPs in the FOR2107 Study*

| rsID      | EA/<br>OA | Risk       | Prot. | Dir.              | Cluster labelling          | Cluster<br>size<br>(k) | MNI152 space<br>(peak voxel) |           |            | T-<br>value | $p_{\text{FWE}}$<br>value | $\eta^2$     |       |
|-----------|-----------|------------|-------|-------------------|----------------------------|------------------------|------------------------------|-----------|------------|-------------|---------------------------|--------------|-------|
|           |           |            |       |                   |                            |                        | x                            | y         | z          |             |                           |              |       |
| rs2388334 | G/A       | ASD<br>BIP | TS    | Pos.              | Angular_L                  | 148                    | -57                          | -58       | 32         | 3.95        | 0.331                     | 0.010        |       |
|           |           |            |       |                   | Temporal_Sup_L             | 49                     | -52                          | -44       | 14         | 3.55        | 0.763                     | 0.008        |       |
|           |           |            |       |                   | Outside                    | 15                     | 34                           | -3        | -26        | 3.47        | 0.844                     | 0.008        |       |
|           |           |            |       |                   | Occipital_Mid_L            | 17                     | -44                          | -88       | 2          | 3.33        | 0.938                     | 0.007        |       |
|           |           |            |       |                   | Temporal_Sup_R             | 42                     | 66                           | -30       | 2          | 3.31        | 0.945                     | 0.007        |       |
|           |           |            |       |                   | Temporal_Mid_L             | 14                     | -62                          | -60       | 18         | 3.29        | 0.955                     | 0.007        |       |
|           |           |            |       |                   | Neg.                       | Cerebellum_3_R         | 39                           | 10        | -36        | -18         | 3.34                      | 0.946        | 0.007 |
|           |           |            |       |                   |                            | Frontal_Mid_2_L        | 18                           | -28       | 28         | 44          | 3.31                      | 0.974        | 0.007 |
|           |           |            |       |                   |                            | Cerebellum_3_L         | 26                           | -9        | -36        | -15         | 3.23                      | 0.964        | 0.007 |
| rs301805  | G/T       | SCZ        | MDD   | Pos.              | Precuneus_R                | 18                     | 10                           | -62       | 44         | 3.45        | 0.873                     | 0.007        |       |
|           |           |            |       | Neg.              | <b>Temporal_Pole_Sup_L</b> | <b>998</b>             | <b>-28</b>                   | <b>10</b> | <b>-22</b> | <b>4.85</b> | <b>0.012</b>              | <b>0.015</b> |       |
|           |           |            |       | OFCpost_R         | 274                        | 26                     | 12                           | -22       | 3.78       | 0.526       | 0.009                     |              |       |
|           |           |            |       | Lingual_L         | 81                         | -14                    | -40                          | -2        | 3.60       | 0.734       | 0.008                     |              |       |
|           |           |            |       | Outside           | 34                         | 14                     | -16                          | -21       | 3.58       | 0.752       | 0.008                     |              |       |
|           |           |            |       | Temporal_Inf_R    | 208                        | 52                     | -4                           | -34       | 3.57       | 0.767       | 0.008                     |              |       |
|           |           |            |       | Hippocampus_R     | 55                         | 26                     | -9                           | -20       | 3.22       | 0.981       | 0.006                     |              |       |
|           |           |            |       | ParaHippocampal_R | 25                         | 32                     | -1                           | -22       | 3.19       | 0.985       | 0.006                     |              |       |
|           |           |            |       | Lingual_R         | 15                         | 15                     | -42                          | -6        | 3.19       | 0.985       | 0.006                     |              |       |

Continues on the next page

Linking Antagonistic SNPs to Brain Structure

**Table S6 continued**

| rsID       | EA/<br>OA | Risk | Prot. | Dir.              | Cluster labelling | Cluster<br>size<br>( <i>k</i> ) | MNI152 space<br>(peak voxel) |            |            | <i>T</i> -<br>value | <i>p</i> <sub>FWE</sub> <sup>-</sup><br>value | $\eta^2$     |              |
|------------|-----------|------|-------|-------------------|-------------------|---------------------------------|------------------------------|------------|------------|---------------------|-----------------------------------------------|--------------|--------------|
|            |           |      |       |                   |                   |                                 | <i>x</i>                     | <i>y</i>   | <i>z</i>   |                     |                                               |              |              |
| rs301805   | G/T       | SCZ  | MDD   | Neg.              | ParaHippocampal_L | 10                              | -15                          | -16        | -22        | 3.18                | 0.986                                         | 0.006        |              |
| rs75595651 | T/C       | BIP  | MDD   | Pos.              | Calcarine_L       | 490                             | -2                           | -100       | -6         | 3.81                | 0.470                                         | 0.009        |              |
|            |           |      |       |                   | Fusiform_L        | 35                              | -39                          | -60        | -16        | 3.54                | 0.776                                         | 0.008        |              |
|            |           |      |       |                   | Frontal_Sup_2_R   | 26                              | 21                           | 52         | 39         | 3.32                | 0.973                                         | 0.007        |              |
| rs1933802  | G/C       | MDD  | SCZ   | Neg.              | Outside           | 16                              | 15                           | -15        | -32        | 3.36                | 0.920                                         | 0.007        |              |
|            |           |      |       |                   | Pos.              | <b>Parietal_Sup_L</b>           | <b>448</b>                   | <b>-20</b> | <b>-69</b> | <b>62</b>           | <b>4.62</b>                                   | <b>0.029</b> | <b>0.013</b> |
|            |           |      |       |                   |                   | Precuneus_R                     | 957                          | 8          | -46        | 54                  | 4.28                                          | 0.108        | 0.011        |
|            |           |      |       | Lingual_L         |                   | 387                             | -9                           | -68        | -4         | 4.16                | 0.166                                         | 0.011        |              |
|            |           |      |       | Precuneus_L       |                   | 79                              | -16                          | -42        | 58         | 3.81                | 0.461                                         | 0.009        |              |
|            |           |      |       | Frontal_Mid_2_L   |                   | 20                              | -34                          | 45         | -6         | 3.76                | 0.514                                         | 0.009        |              |
|            |           |      |       | Frontal_Med_Orb_L |                   | 199                             | -2                           | 69         | -2         | 3.74                | 0.537                                         | 0.009        |              |
|            |           |      |       | Calcarine_L       |                   | 559                             | -3                           | -102       | -2         | 3.69                | 0.597                                         | 0.009        |              |
|            |           |      |       | Frontal_Sup_2_R   |                   | 143                             | 20                           | 63         | -4         | 3.40                | 0.885                                         | 0.007        |              |
|            |           |      |       | Parietal_Sup_R    |                   | 23                              | 30                           | -58        | 62         | 3.38                | 0.902                                         | 0.007        |              |
|            |           |      |       | Outside           |                   | 66                              | -15                          | 46         | -10        | 3.37                | 0.906                                         | 0.007        |              |
|            |           |      |       | Rolandic_Oper_R   |                   | 23                              | 52                           | 2          | 8          | 3.24                | 0.967                                         | 0.007        |              |
|            |           |      |       | Outside           |                   | 14                              | -28                          | -98        | -15        | 3.23                | 0.968                                         | 0.007        |              |
|            |           |      |       | Neg.              | Cerebellum_7b_R   | 37                              | 46                           | -52        | -54        | 3.50                | 0.803                                         | 0.008        |              |
|            |           |      |       |                   | Parietal_Inf_L    | 18                              | -44                          | -56        | 56         | 3.29                | 0.948                                         | 0.007        |              |
| Outside    | 19        | 0    | -10   |                   | 2                 | 3.22                            | 0.971                        | 0.006      |            |                     |                                               |              |              |

Continues on the next page

Linking Antagonistic SNPs to Brain Structure

**Table S6 continued**

| rsID             | EA/<br>OA | Risk | Prot. | Dir.      | Cluster labelling | Cluster<br>size<br>( <i>k</i> ) | MNI152 space<br>(peak voxel) |          |                | <i>T</i> -<br>value | <i>p</i> <sub>FWE</sub> -<br>value | $\eta^2$ |       |      |       |       |
|------------------|-----------|------|-------|-----------|-------------------|---------------------------------|------------------------------|----------|----------------|---------------------|------------------------------------|----------|-------|------|-------|-------|
|                  |           |      |       |           |                   |                                 | <i>x</i>                     | <i>y</i> | <i>z</i>       |                     |                                    |          |       |      |       |       |
| rs6748341        | G/C       | ANO  | SCZ   | Pos.      | Fusiform_L        | 183                             | -28                          | -28      | -22            | 3.83                | 0.421                              | 0.009    |       |      |       |       |
|                  |           |      |       |           | Temporal_Sup_R    | 56                              | 64                           | -21      | 15             | 3.65                | 0.626                              | 0.008    |       |      |       |       |
|                  |           |      |       |           | Hippocampus_R     | 42                              | 39                           | -33      | -9             | 3.53                | 0.756                              | 0.008    |       |      |       |       |
|                  |           |      |       |           | Temporal_Sup_R    | 10                              | 54                           | -20      | 9              | 3.21                | 0.989                              | 0.006    |       |      |       |       |
| rs3806843        | C/T       | MDD  | SCZ   | Neg.      | ACC_pre_R         | 19                              | 14                           | 46       | 21             | 3.50                | 0.790                              | 0.008    |       |      |       |       |
|                  |           |      |       | Pos.      | Outside           | 29                              | 32                           | -9       | 14             | 3.42                | 0.871                              | 0.008    |       |      |       |       |
|                  |           |      |       |           | Neg.              | Outside                         | 302                          | 6        | -74            | -46                 | 3.57                               | 0.733    | 0.008 |      |       |       |
|                  |           |      |       | rs9329221 | T/G               | SCZ                             | ASD                          | Pos.     | Outside        | 44                  | 18                                 | -93      | -21   | 3.51 | 0.793 | 0.008 |
|                  |           |      |       |           |                   |                                 |                              |          | Temporal_Inf_R | 55                  | 46                                 | -16      | -40   | 3.45 | 0.847 | 0.008 |
|                  |           |      |       |           |                   |                                 |                              |          | Cerebellum_6_R | 28                  | 12                                 | -69      | -27   | 3.32 | 0.931 | 0.007 |
| Temporal_Mid_R   | 95        | 39   | -64   |           |                   |                                 |                              |          | 18             | 3.77                | 0.510                              | 0.009    |       |      |       |       |
| rs9329221        | T/G       | SCZ  | ASD   | Pos.      | Temporal_Mid_L    | 39                              | -69                          | -26      | -18            | 3.52                | 0.788                              | 0.008    |       |      |       |       |
|                  |           |      |       |           | Temporal_Mid_L    | 113                             | -58                          | -66      | -2             | 3.47                | 0.838                              | 0.008    |       |      |       |       |
|                  |           |      |       |           | Cingulate_Mid_R   | 37                              | 8                            | -9       | 39             | 3.36                | 0.916                              | 0.007    |       |      |       |       |
|                  |           |      |       |           | Hippocampus_L     | 74                              | -28                          | -27      | -10            | 3.34                | 0.925                              | 0.007    |       |      |       |       |
|                  |           |      |       |           | Hippocampus_R     | 59                              | 32                           | -28      | -8             | 3.26                | 0.961                              | 0.007    |       |      |       |       |
|                  |           |      |       |           | Neg.              | Outside                         | 57                           | 18       | -21            | -33                 | 4.23                               | 0.129    | 0.011 |      |       |       |
|                  |           |      |       |           |                   | Occipital_Mid_R                 | 508                          | 30       | -84            | 21                  | 4.08                               | 0.218    | 0.011 |      |       |       |
|                  |           |      |       |           |                   | Lingual_L                       | 19                           | -20      | -68            | -2                  | 3.58                               | 0.723    | 0.008 |      |       |       |
| Cerebellum_4_5_L | 262       | -6   | -57   | -20       | 3.38              | 0.906                           | 0.007                        |          |                |                     |                                    |          |       |      |       |       |

Continues on the next page



Linking Antagonistic SNPs to Brain Structure

**Table S6 continued**

| rsID                 | EA/<br>OA | Risk | Prot. | Dir. | Cluster labelling    | Cluster<br>size<br>( <i>k</i> ) | MNI152 space<br>(peak voxel) |          |          | <i>T</i> -<br>value | <i>p</i> <sub>FWE</sub> <sup>-</sup><br>value | $\eta^2$ |
|----------------------|-----------|------|-------|------|----------------------|---------------------------------|------------------------------|----------|----------|---------------------|-----------------------------------------------|----------|
|                      |           |      |       |      |                      |                                 | <i>x</i>                     | <i>y</i> | <i>z</i> |                     |                                               |          |
| rs2921036            | C/T       | SCZ  | ASD   | Pos. | Postcentral_L        | 564                             | -33                          | -45      | 52       | 4.27                | 0.114                                         | 0.012    |
|                      |           |      |       |      | Cingulate_Mid_R      | 619                             | 8                            | -9       | 38       | 4.09                | 0.207                                         | 0.011    |
|                      |           |      |       |      | Outside              | 219                             | 9                            | -39      | 28       | 3.92                | 0.347                                         | 0.010    |
|                      |           |      |       |      | Precuneus_L          | 47                              | -4                           | -46      | 75       | 3.63                | 0.662                                         | 0.008    |
|                      |           |      |       |      | Hippocampus_L        | 79                              | -28                          | -28      | -8       | 3.58                | 0.716                                         | 0.008    |
|                      |           |      |       |      | Neg. Cerebellum_6_L  | 1204                            | -3                           | -66      | -16      | 4.41                | 0.066                                         | 0.012    |
|                      |           |      |       |      | Occipital_Sup_R      | 321                             | 28                           | -86      | 24       | 3.68                | 0.603                                         | 0.009    |
| rs2867673            | C/T       | SCZ  | ASD   | Pos. | Cerebellum_6_L       | 56                              | -22                          | -64      | -14      | 3.34                | 0.924                                         | 0.007    |
|                      |           |      |       |      | Parietal_Sup_R       | 19                              | 21                           | -74      | 54       | 3.46                | 0.859                                         | 0.007    |
|                      |           |      |       |      | Neg. Rolandic_Oper_L | 417                             | -48                          | 2        | 10       | 4.11                | 0.206                                         | 0.010    |
|                      |           |      |       |      | Outside              | 224                             | 20                           | 12       | -42      | 3.85                | 0.441                                         | 0.009    |
|                      |           |      |       |      | Lingual_R            | 13                              | 9                            | -40      | -4       | 3.26                | 0.966                                         | 0.007    |
|                      |           |      |       |      | OFCpost_L            | 10                              | -21                          | 12       | -18      | 3.18                | 0.986                                         | 0.006    |
|                      |           |      |       |      | rs9511168            | A/C                             | ADHD                         | ANO      | Pos.     | Precuneus_R         | 97                                            | 18       |
| Frontal_Sup_2_L      | 37        | -16  | 60    | 30   |                      |                                 |                              |          |          | 3.56                | 0.752                                         | 0.008    |
| Cuneus_R             | 44        | 10   | -76   | 28   |                      |                                 |                              |          |          | 3.54                | 0.772                                         | 0.008    |
| Fusiform_L           | 176       | -34  | 0     | -34  |                      |                                 |                              |          |          | 3.48                | 0.833                                         | 0.008    |
| Olfactory_R          | 60        | 10   | 26    | -12  |                      |                                 |                              |          |          | 3.39                | 0.897                                         | 0.007    |
| Paracentral_Lobule_L | 18        | -2   | -20   | 76   |                      |                                 |                              |          |          | 3.33                | 0.933                                         | 0.007    |
| Neg. OFCmed_R        | 67        | 21   | 48    | -21  |                      |                                 |                              |          |          | 3.50                | 0.806                                         | 0.008    |

Continues on the next page

## Linking Antagonistic SNPs to Brain Structure

**Table S6 continued**

| rsID            | EA/<br>OA | Risk | Prot. | Dir. | Cluster labelling    | Cluster<br>size<br>( <i>k</i> ) | MNI152 space<br>(peak voxel) |          |          | <i>T</i> -<br>value | $p_{\text{FWE}}$ -<br>value | $\eta^2$ |
|-----------------|-----------|------|-------|------|----------------------|---------------------------------|------------------------------|----------|----------|---------------------|-----------------------------|----------|
|                 |           |      |       |      |                      |                                 | <i>x</i>                     | <i>y</i> | <i>z</i> |                     |                             |          |
| rs9511168       | A/C       | ADHD | ANO   | Neg  | Precuneus_L          | 16                              | -9                           | -45      | 54       | 3.37                | 0.911                       | 0.007    |
| rs1363105       | T/C       | ANO  | ADHD  | Pos. | Frontal_Inf_Tri_R    | 565                             | 51                           | 24       | 18       | 4.13                | 0.190                       | 0.011    |
|                 |           |      |       |      | Outside              | 96                              | 16                           | -21      | -30      | 3.89                | 0.391                       | 0.009    |
|                 |           |      |       |      | MDD                  | 172                             | -8                           | -99      | -6       | 3.74                | 0.555                       | 0.009    |
|                 |           |      |       |      | Lingual_R            | 71                              | 10                           | -56      | 2        | 3.51                | 0.815                       | 0.008    |
|                 |           |      |       |      | Calcarine_R          | 42                              | 15                           | -69      | 4        | 3.43                | 0.884                       | 0.007    |
|                 |           |      |       |      | Temporal_Inf_R       | 24                              | 50                           | -60      | -4       | 3.33                | 0.941                       | 0.007    |
|                 |           |      |       |      | Frontal_Sup_2_R      | 21                              | 22                           | 12       | 58       | 3.25                | 0.970                       | 0.007    |
|                 |           |      |       |      | Neg. Frontal_Mid_2_R | 13                              | 34                           | 9        | 38       | 3.30                | 0.954                       | 0.007    |
| Frontal_Mid_2_L | 28        | -36  | 14    | 38   | 3.29                 | 0.956                           | 0.007                        |          |          |                     |                             |          |

255 Whole-brain analyses were conducted using a multiple regression design in the CAT12 toolbox (14). Positive and negative associations  
256 between gray matter volume and the genotype dosages were reported for clusters with size  $k > 10$  and  $p_{\text{uncorrected}} < 1 \times 10^{-3}$ . Significant  
257 associations with  $p_{\text{FWE}} < 0.05$  (peak-level Family Wise Error (FWE) correction for multiple comparison) were marked as bold. Results  
258 of the two SNPs, rs301805 and rs1933802, that show an association with GMV at  $p_{\text{FWE}} < 0.05$ , are visualized in Figure 4. We used the  
259 automated anatomical labelling atlas version 3 (36,37) to annotate the clusters anatomically and presented the label with the highest  
260 cluster proportion. The partial effect size  $\eta^2$  was computed based on *T*-values and its degree of freedom (Equation 4 in (38)). ACC\_pre,  
261 anterior cingulate cortex pregenual; Dir., direction of association; EA, effect allele; Inf, inferior; L, left; Med, medial; Mid, middle; OA,

## Linking Antagonistic SNPs to Brain Structure

- 262 other allele; OFCmed, medial orbital gyrus; OFCpost, posterior orbital gyrus; Oper, operculum; Orb, orbitalis; Prot., protective; R, right;
- 263 ROI, region of interest; Sup, superior; Tri, triangular.

264

Supplementary Figures

265 **Figure S1**

266 *Results of the Bootstrapping Test*

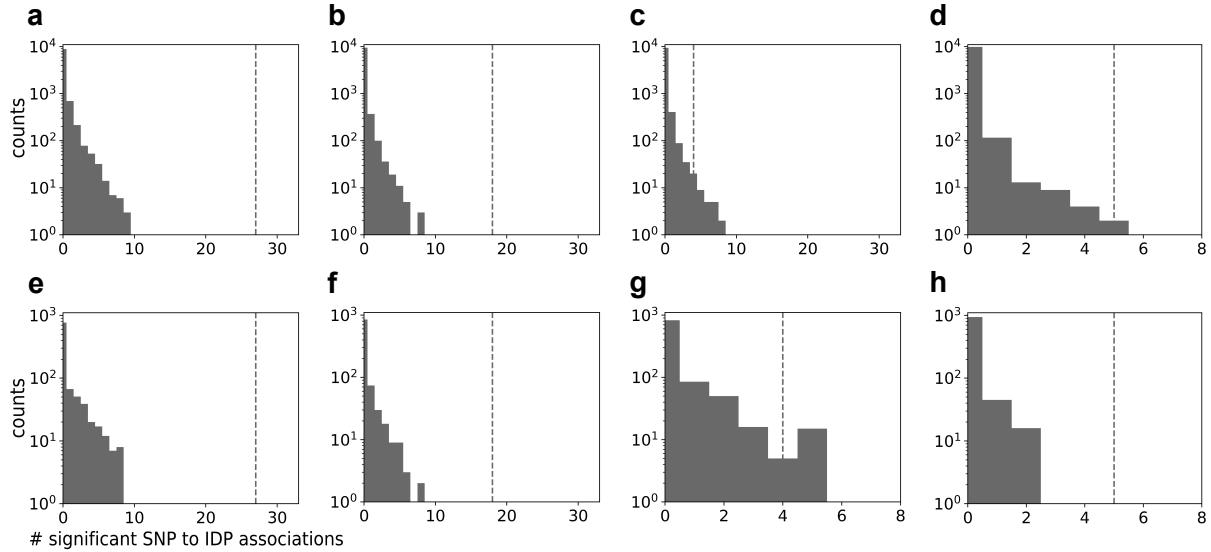

267

268 The number of significant SNP to IDP associations for the eleven antagonistic SNPs was compared  
 269 to the sampled distribution of the number of significant SNP to IDP associations obtained by  
 270 resampling sets of eleven SNPs. Figure S1 shows the approximated distribution of the number of  
 271 significant SNP to IDP associations obtained by resampling eleven SNPs from the following SNP  
 272 sets: **a-d** SNPs randomly drawn from the joined set of SNPs across the 78 summary statistics of  
 273 each IDP (1–3); **e-h** SNPs randomly drawn from SNPs identified in the PGC-CDG2 GWAS meta-  
 274 analysis (4) with  $p \leq 1 \times 10^{-06}$  and covered in the joined set of SNPs across the summary statistics of  
 275 78 IDPs. Note that the number of significant SNP to IDP associations is shown across all 78 IDPs  
 276 (**a,e**), 35 IDPs for surface area (**b,f**), 35 IDPs for cortical thickness (**c,g**), and eight IDPs for  
 277 subcortical volume measurements (**d,h**). Horizontal lines indicate the number of significant SNP

## Linking Antagonistic SNPs to Brain Structure

278 to IDP associations observed for the eleven antagonistic SNPs. IDP, image-derived phenotype;

279 SNP, single-nucleotide polymorphism.

Linking Antagonistic SNPs to Brain Structure

280 **Figure S2**

281 *Visualization of Significant Clusters ( $p_{FWE}<0.05$ ) and their Peak Voxel from the Whole-Brain*

282 *Analysis in the FOR2107 Study*

**A** rs301805

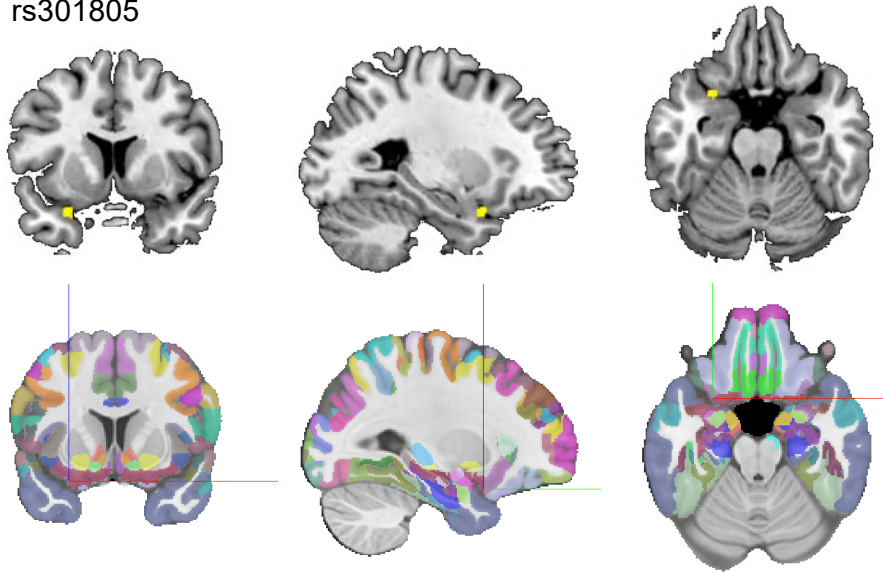

**B** rs1933802

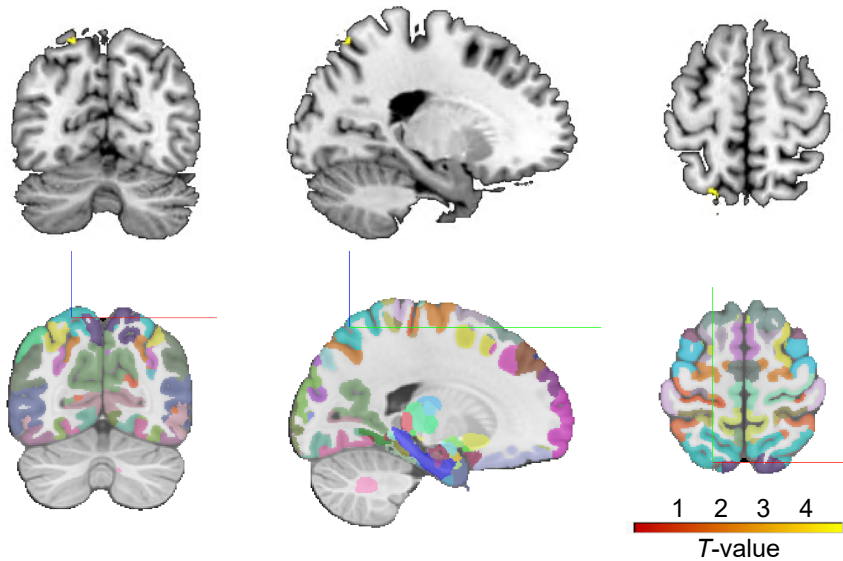

283

284 **A** The G allele of rs301805 was significantly negatively associated ( $p_{FWE}<0.05$ ) with a GMV

285 cluster that was labeled as left superior temporal pole by the anatomical labelling atlas v3 (36,37).

## Linking Antagonistic SNPs to Brain Structure

286 The corresponding peak-voxel  $x/y/z=-28/10/-22$  was mapped to the left Frontal-to-Temporal-II  
287 GapMap based on the Julich Brain Atlas v3.1 (39) and is depicted in the bottom row using the  
288 EBRAINS viewer (<https://atlases.ebrains.eu/viewer/#/>). **B** The G allele of rs1933802 was  
289 significantly positively associated ( $p_{\text{FWE}} < 0.05$ ) with a GMV cluster that was labeled as left superior  
290 parietal region by the anatomical labelling atlas v3 (36,37). Similarly to **A**, the corresponding peak  
291 voxel ( $x/y/z=-20/-69/62$ ) is depicted in the bottom row using the EBRAINS viewer and was  
292 mapped to the left Area 7A of the superior parietal lobe based on the Julich Brain Atlas v3.1 (39).  
293 FWE, family-wise error; GMV, gray matter volumes.
